# Supplementary material
Source: PubMed Central journal article supplement (PMC6817355)
Supplement: EMS83612-supplement-Supplementary_information.pdf [file EMS83612-supplement-Supplementary_information.pdf]

## **SUPPLEMENTARY INFORMATION**

### **Atomic structures of an entire contractile injection system in both the extended and contracted states**

Ambroise Desfosses, Hariprasad Venugopal, Tapan Joshi, Jan Felix, Matthew Jessop,  
Hyengseop Jeong, Jaekyung Hyun, J. Bernard Heymann, Mark R. H. Hurst \*,  
Irina Gutsche \*, Alok K. Mitra \*

\*: corresponding author

**Supplementary Figures 1 to 9**

**Supplementary Tables 1 to 6**

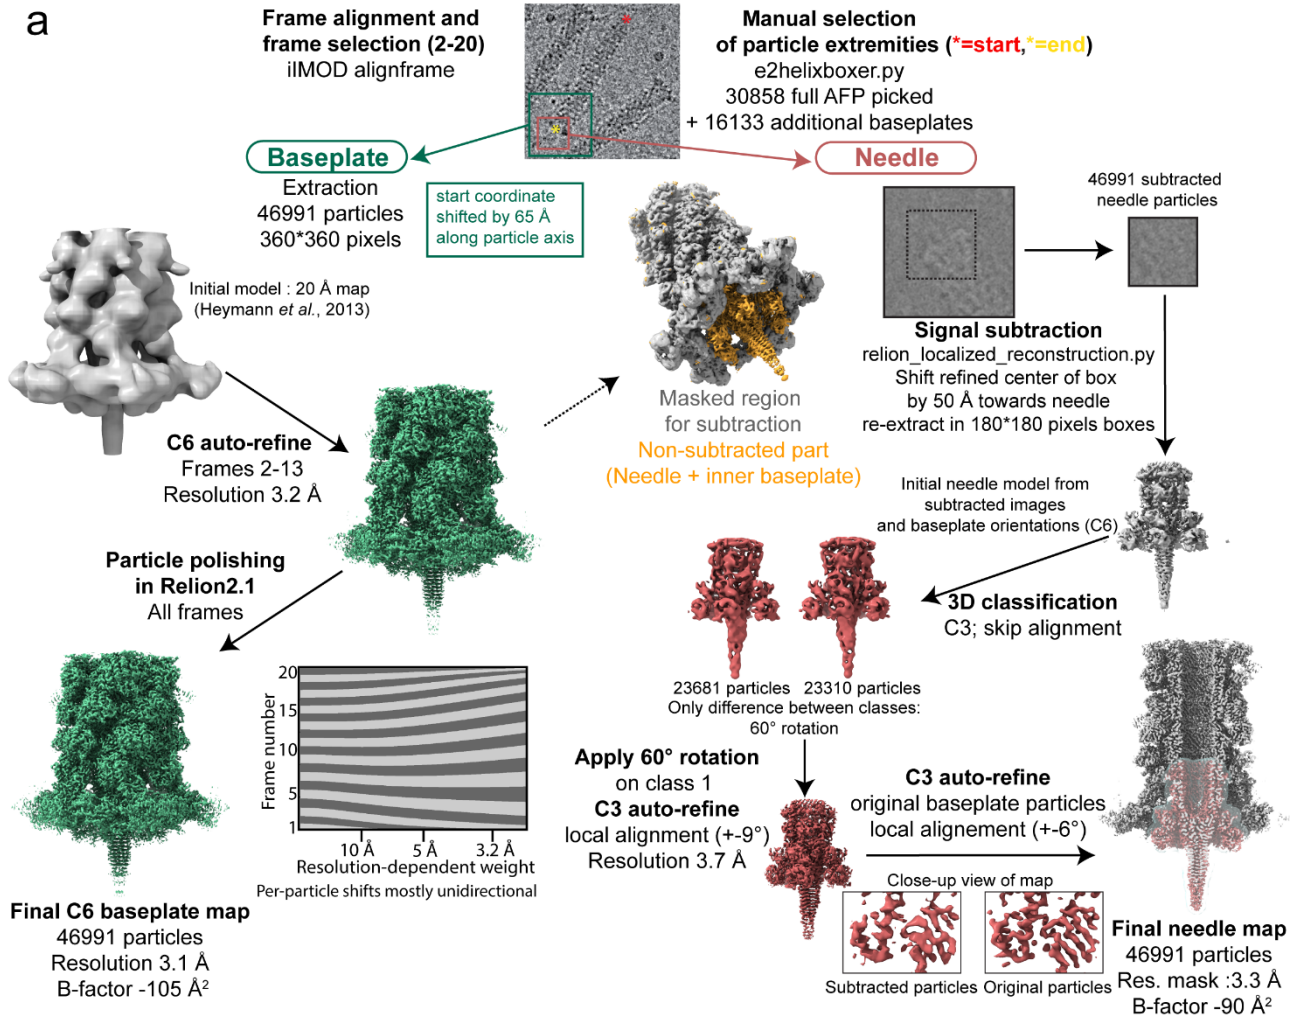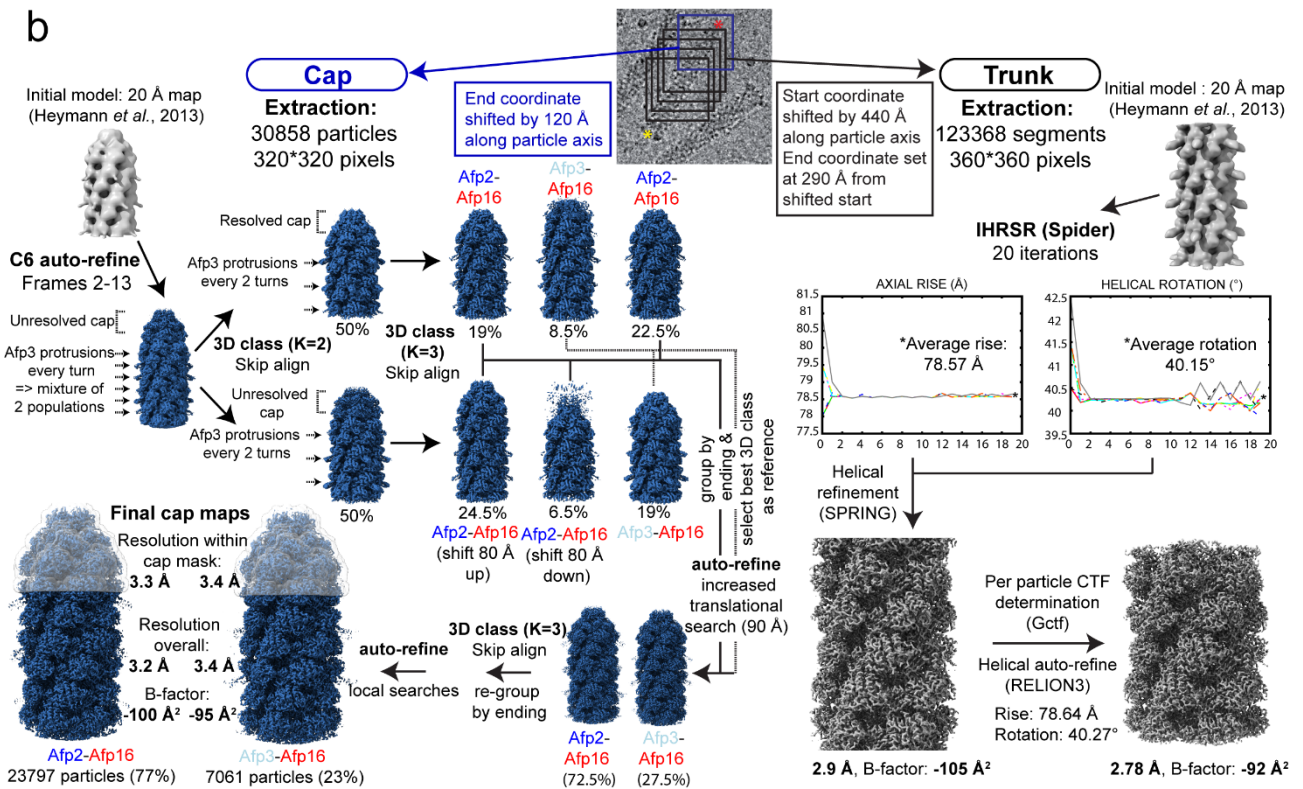

**Supplementary Figure 1: Flowcharts of the image processing pipeline for the AFP baseplate and needle (a), and apical cap and trunk (b) in the extended state.** In the flowcharts, a representative micrograph is shown with boxed picked particles for the Baseplate (a, green), Needle (a, red), Cap (b, blue) and Trunk (b, black), followed by subsequent particle extraction, masking, signal subtraction, classification and refinement procedures performed in this study. At the bottom of each flowchart, final maps are shown with annotated overall resolution and b-factor. Used software packages are indicated where needed. For a full description of the image processing pipeline, see 'Methods'.

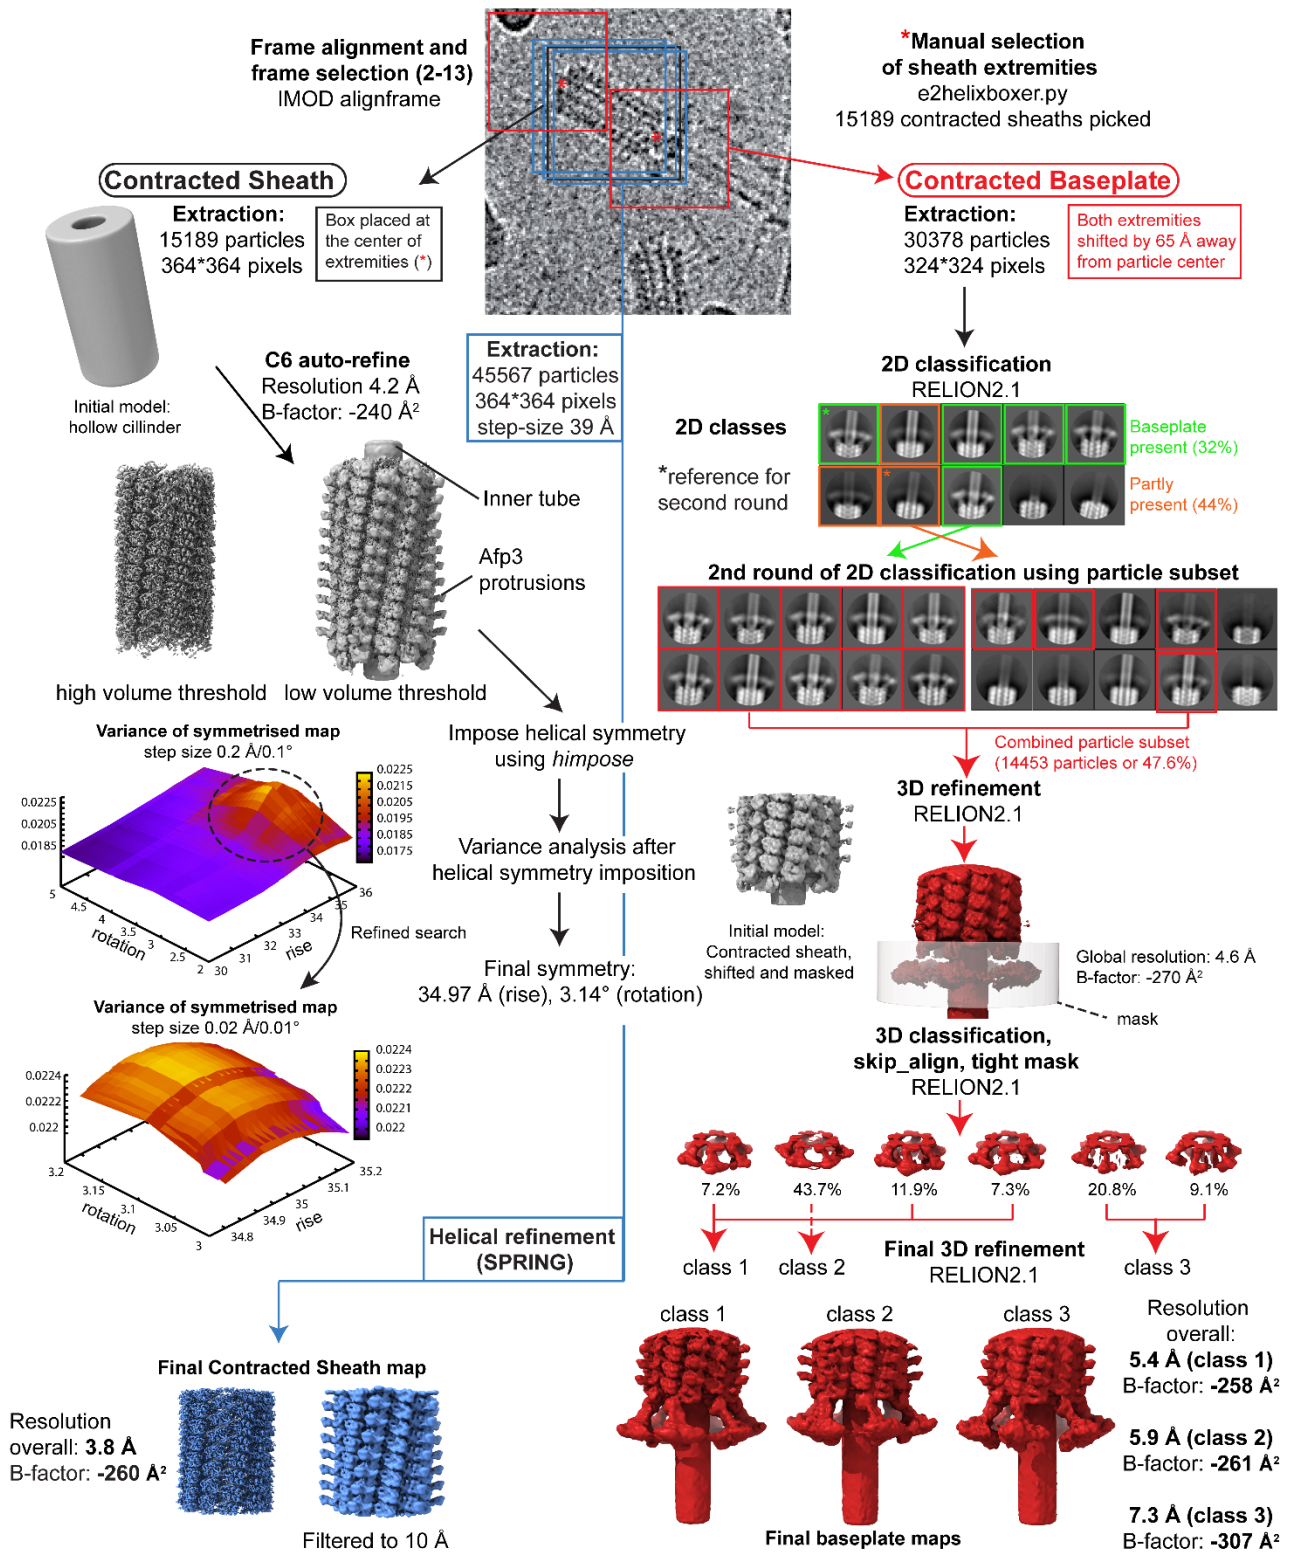

**Supplementary Figure 2: Flowchart of the image processing pipeline for the AFP sheath and baseplate in the contracted state.** A representative micrograph is shown with boxed picked particles (black: Contracted Sheath start, blue: Contracted Sheath final, red: Contracted Baseplate), followed by subsequent particle extraction, masking, classification and refinement procedures performed in this study. At the bottom of the flowchart, final maps are shown with annotated overall resolution and b-factor. Used software packages are indicated where needed. For a full description of the image processing pipeline, see 'Methods'.

**a** Extended AFP Needle (subtracted)    **b** Extended AFP Baseplate (C3)    **c** Extended AFP Cap (Afp2-Afp16)

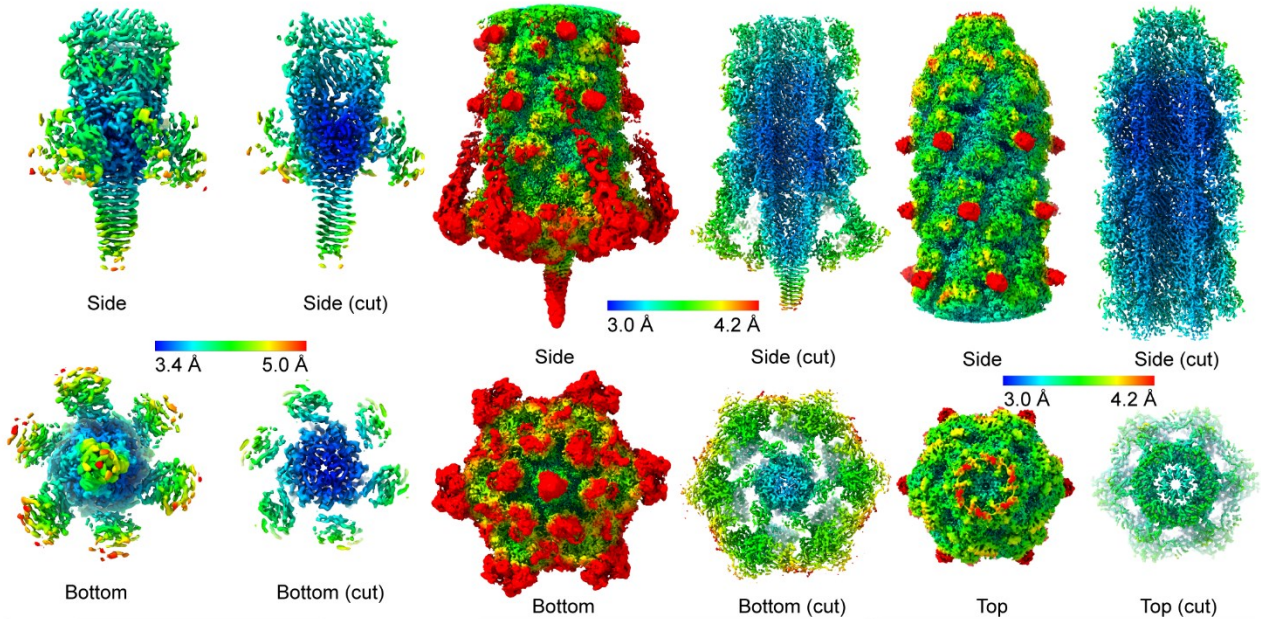

**d** Extended AFP Trunk    **e** Extended AFP Baseplate (C6)    **f** Extended AFP Cap (Afp3-Afp16)

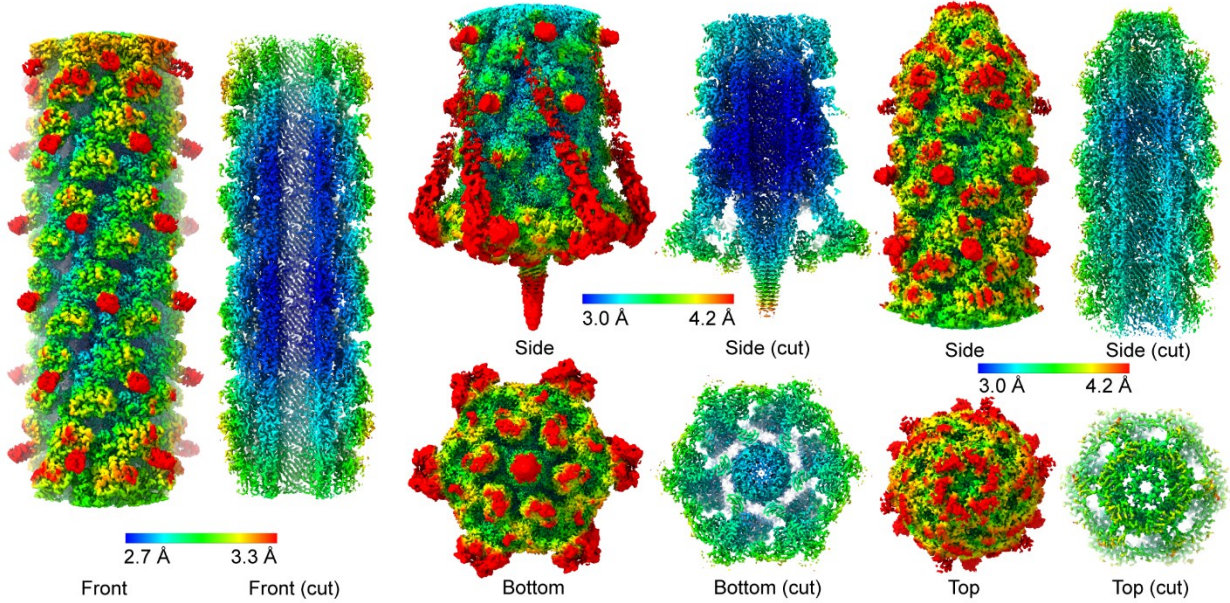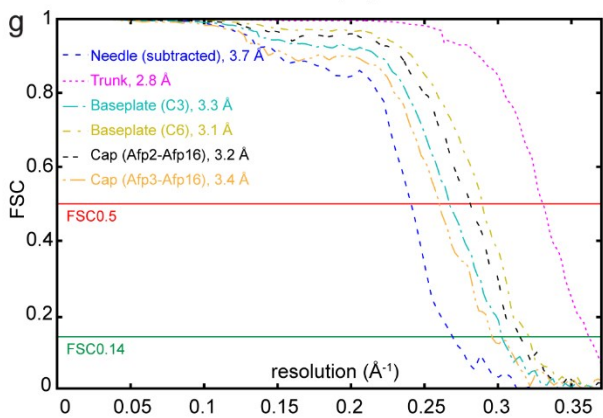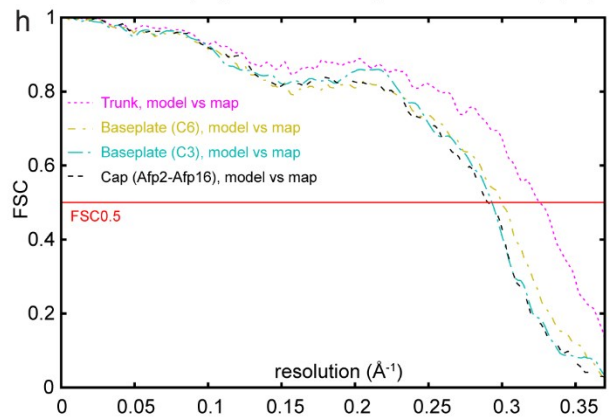

**Supplementary Figure 3: Gallery of unmasked cryo-EM maps, filtered and coloured by local resolution, and accompanying FSC curves for the extended AFP apical cap, trunk, baseplate and needle.** Unmasked cryo-EM maps for the extended AFP needle (a), baseplate processed with C3 symmetry (b), cap terminating with Afp2-Afp16 (c), trunk (d), baseplate processed with C6 symmetry (e), and cap terminating with Afp3-Afp16 (f) filtered and coloured by local resolution. For panels b, c, d, e and f, contour levels ( $\sigma$ -values) used in Chimera to generate full and cut-out views are: full = 0.015 and cut-out = 0.07 (b), full = 0.02 and cut-out = 0.09 (c), full = 0.025 and cut-out = 0.08 (d), full = 0.015 and cut-out = 0.07 (e), full = 0.02 and cut-out = 0.09 (f). (g) Accompanying FSC curves for the maps shown in (a-f). In the legend, the resolution at the FSC cut-off of 0.5 (red) and 0.143 (green) is indicated. (f) Accompanying model vs map FCS curves for the extended AFP trunk, baseplate (C6), baseplate (C3) and cap. The resolution at the FSC cut-off of 0.5 is indicated in red.

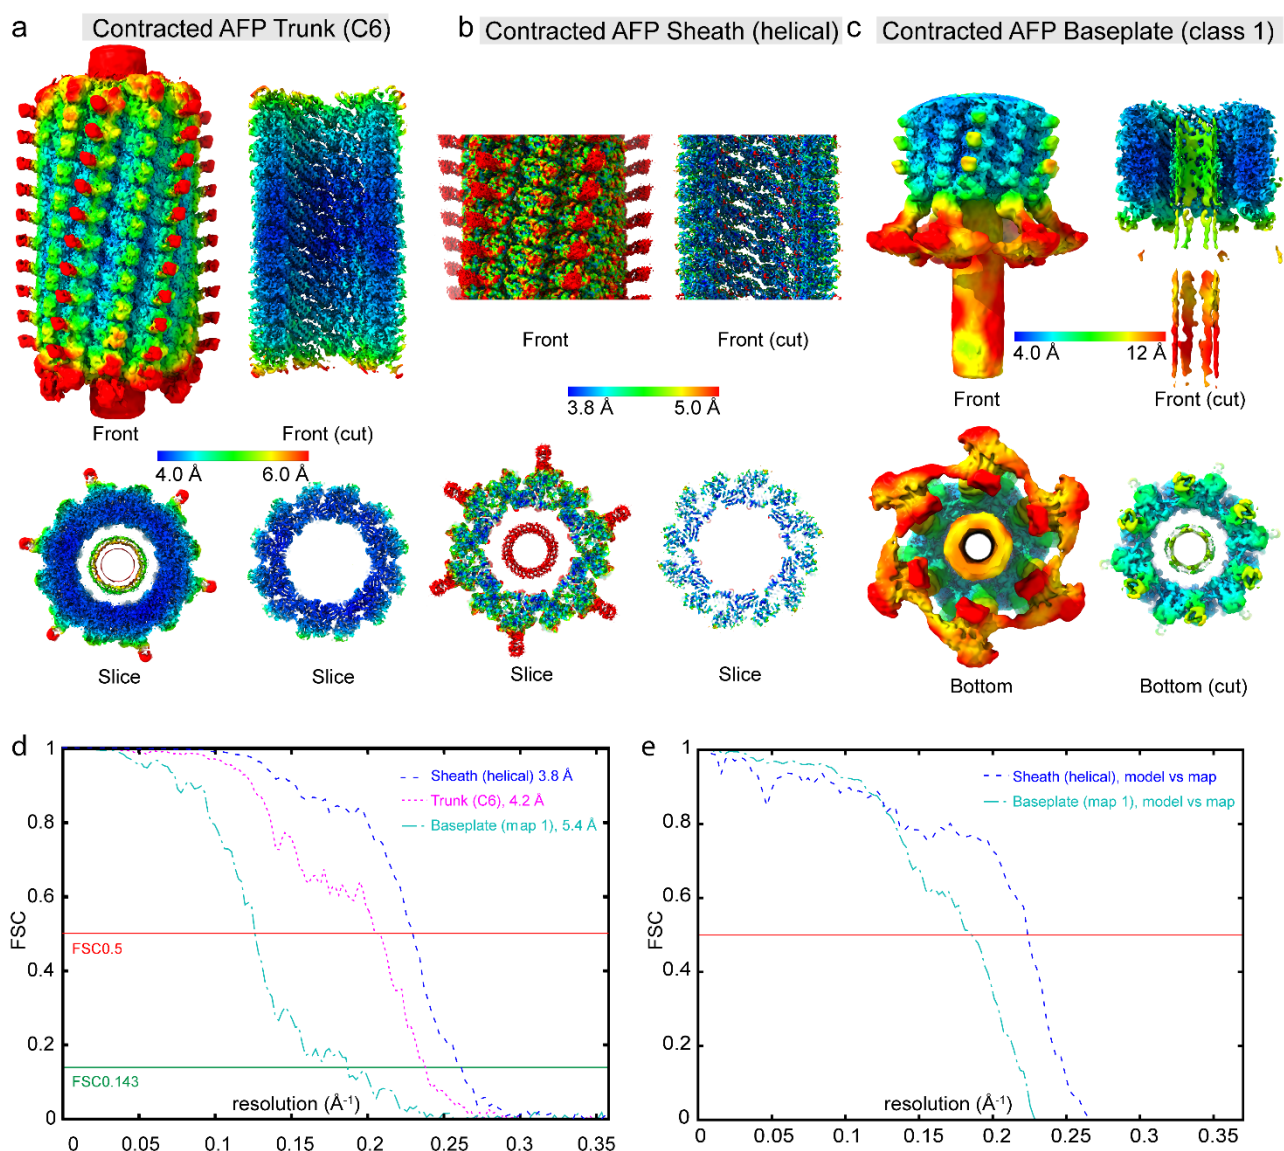

**Supplementary Figure 4: Gallery of unmasked cryo-EM maps, filtered and coloured by local resolution, and accompanying FSC curves for the contracted AFP apical sheath and baseplate.** Unmasked cryo-EM maps for the entire contracted AFP trunk processed with C6 symmetry (a), sheath processed with helical symmetry (b), and baseplate map 1 (c) filtered and coloured by local resolution. For panels a, b and c, the contour levels ( $\sigma$ -values) used in Chimera to generate full and cut-out views are: full = 0.035 and cut-out = 0.1 (a), full = 0.9 and cut-out = 2.5 (b), full = 0.03 and cut-out = 0.065 (c). (d) Accompanying FSC curves for the maps shown in a-c. In the legend, the resolution at the FSC cut-off of 0.5 (red) and 0.143 (green) is indicated. (f) Accompanying model vs map FCS curves for the contracted AFP helical sheath and baseplate. The resolution at the FSC cut-off of 0.5 is indicated in red.



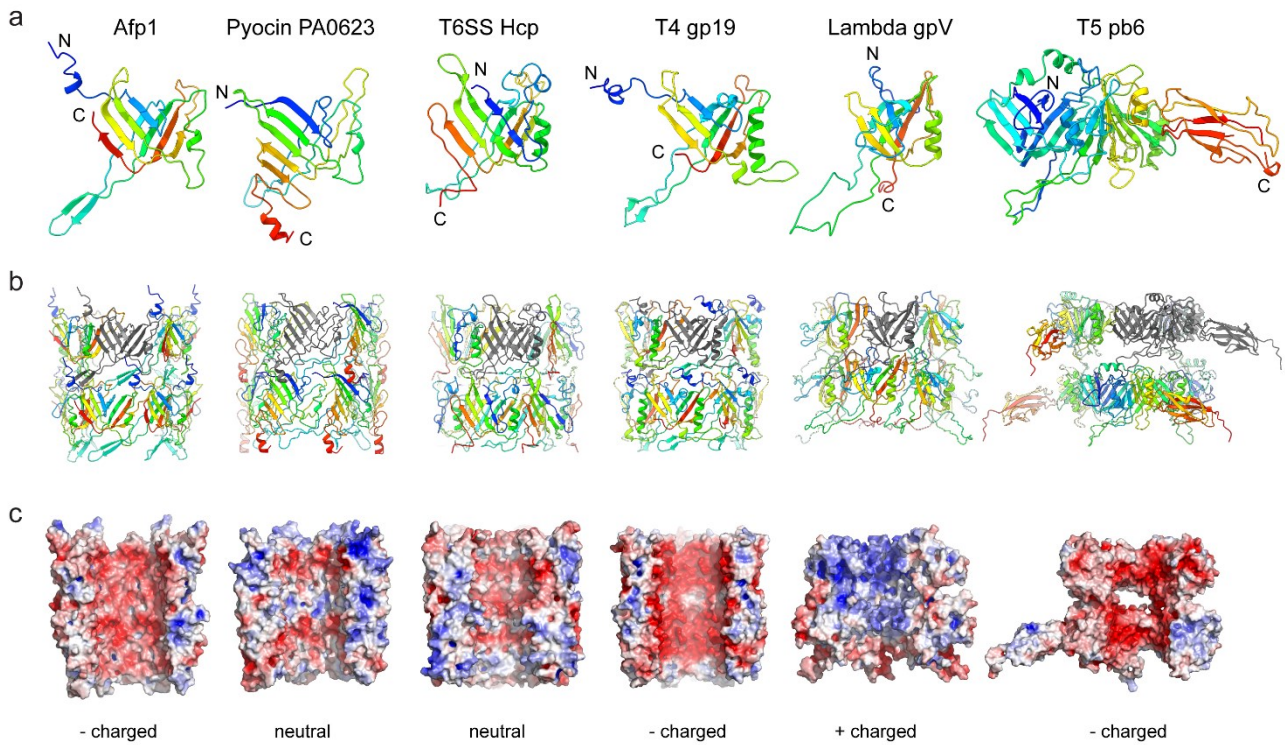

**Supplementary Figure 5: Comparison of tube proteins for AFP (Afp1), Pyocin (PA0623), T6SS (Hcp), phage T4 (gp19), phage Lambda (gpV), and phage T5 (pb6).** (a) Comparison of extracted monomers of Pyocin PA0623 (PDB ID: 5W5E) T6SS Hcp (PDB ID: 5OjQ), T4 gp19 (PDB ID: 5IV5), phage Lambda gpV (PDB ID: 2K4Q) and phage T5 pb6 (PDB ID: 5NGJ). Structures are shown as cartoons and coloured using a rainbow gradient with annotated N- and C-termini. (b) Double hexameric ring assemblies, corresponding to a 2-layer tube, formed by the tube proteins shown in (a). One monomer per tube is coloured dark grey. (c) Cut-out view of the hexameric ring assemblies shown in (b), coloured according to an electrostatic potential map calculated using APBS (Adaptive Poisson-Boltzmann Solver), where red and blue correspond to negative and positive charges respectively.

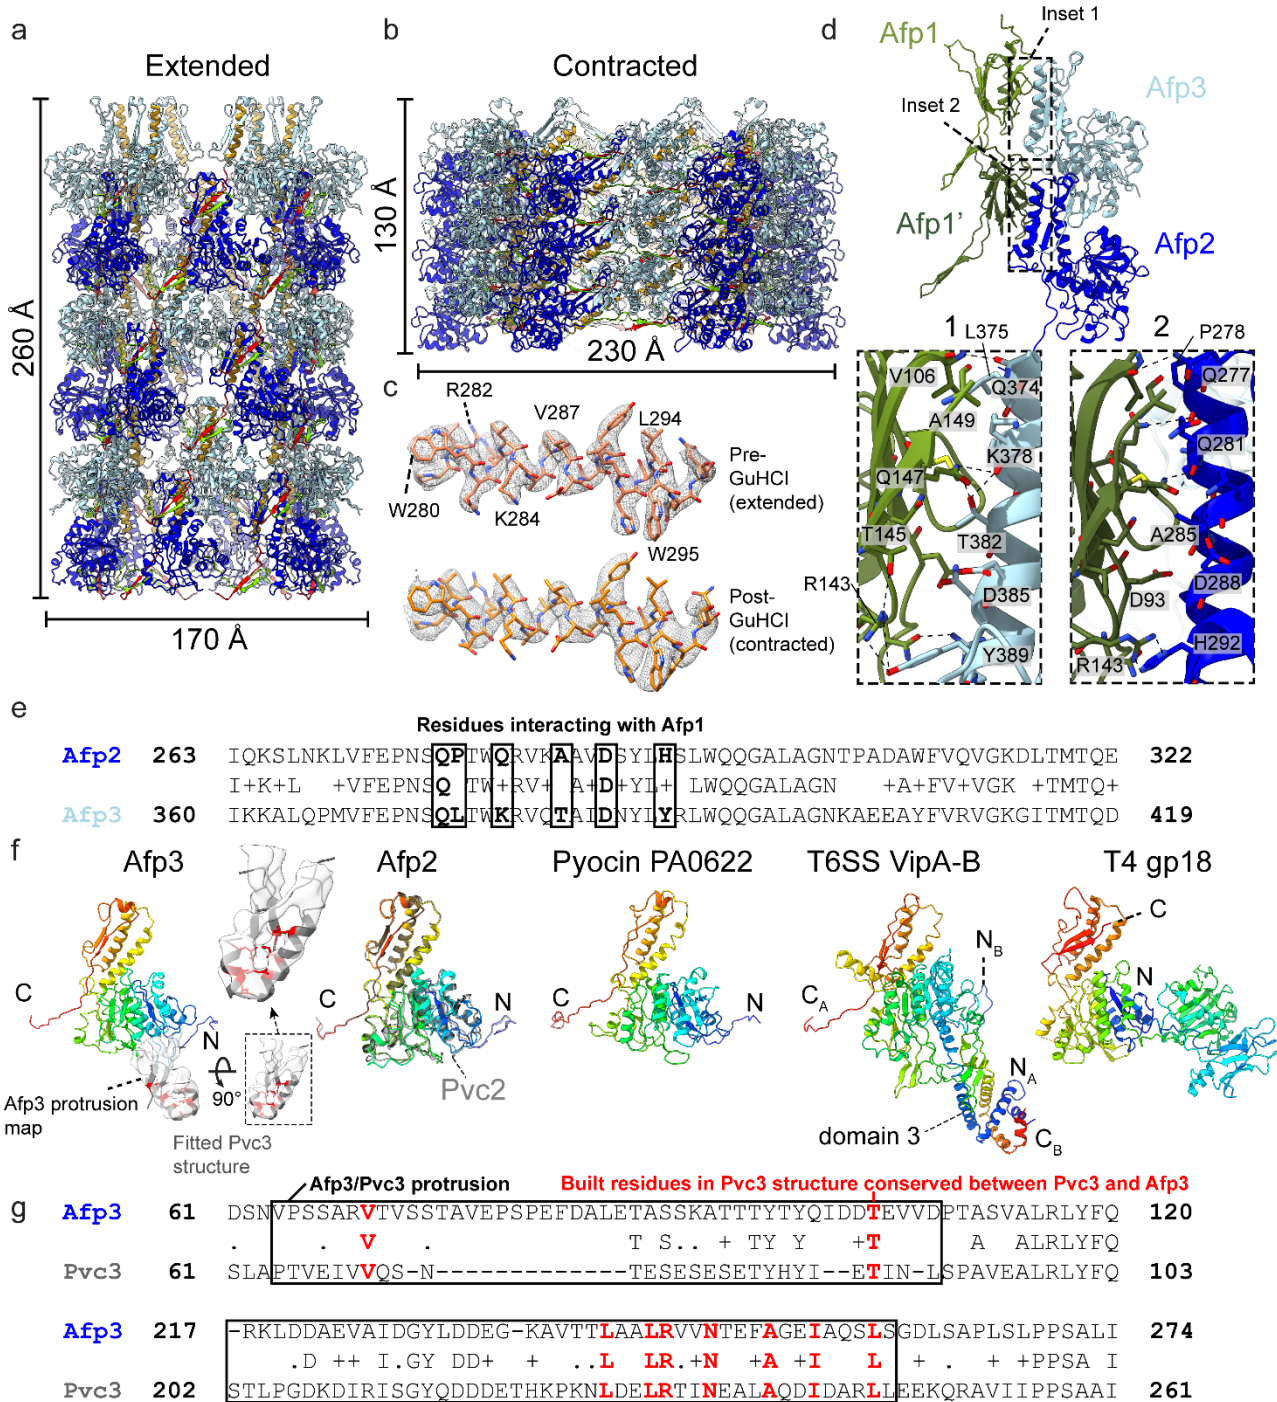

**Supplementary Figure 6: Interactions between the extended AFP tube and sheath, and comparison with the contracted AFP state.** (a-b) Structural organisation of Afp2 (dark blue) and Afp3 (light blue) in the extended (a) and contracted (b) AFP sheath. The  $\beta$ -strands from N and C-termini of Afp2 and Afp3, involved in the handshake ( $\beta$ -strand exchange) mechanism are coloured green (N-ter) and red (C-ter). The length of three layers of alternating Afp2/Afp3 rings is annotated for the extended (a) and contracted (b) AFP sheath. (c) Density for the  $\alpha$ -helix spanning residues Proline 278 (P278) to Glutamine 297 (Q297) of Afp2 before (extended state) and after (contracted

state) addition of guanidinium chloride (GuHCL) is shown. Note the slightly disappearing density for residues Arginine 282 (R282), Lysine 284 (K284), Valine 287 (V287) and Leucine 294 (L294) after addition of GuHCL. (d) Interaction between two copies of Afp1 (light and dark green), Afp2 (dark blue) and Afp3 (light blue) in the AFP extended state. Inset 1 and 2 show a zoom of the interactions between Afp1 (light green) and Afp3 (light blue) and Afp1' (dark green) and Afp3 (dark blue) respectively. Structures are shown as cartoons while selected interacting residues are shown as sticks. H-bonds and electrostatic interactions are depicted using dotted black lines. (e) Sequence alignment between the  $\alpha$ -helices spanning residues 263-322 of Afp2 and residues 360-419 of Afp3. Residues of Afp2/Afp3 interacting with Afp1 are annotated using black boxes. (f) Comparison between the sheath proteins from AFP (Afp2 and 3), PVC (Pvc2, PDB ID: 6J0B), Pyocin (PA0622, PDB ID: 3J9Q), T6SS (VipA and B, PDB ID: 3J9G) and phage T4 (gp18, PDB ID: 3J2M). Structures are shown as cartoons and coloured using a rainbow gradient, except for Pvc2 which is coloured grey, with annotated N- and C-termini. For Afp3, density is shown for the protrusion made up by two separate loops containing residues 65-105 and 215-265 (not modelled) in which the corresponding protrusion of Pvc3 is fitted (PDB ID: 6J0N). Conserved residues between Afp3 and Pvc3 in the protrusion domain are shown in red. (g) Sequence alignment between the protrusion domain of Afp3 and Pvc3. Conserved residues between Afp3 and Pvc3 are labelled in black, while conserved residues between Afp3 and Pvc3 which are present in the Pvc3 structure are labelled red. The split Afp3/Pvc3 protrusion domain is indicated by two black boxes.

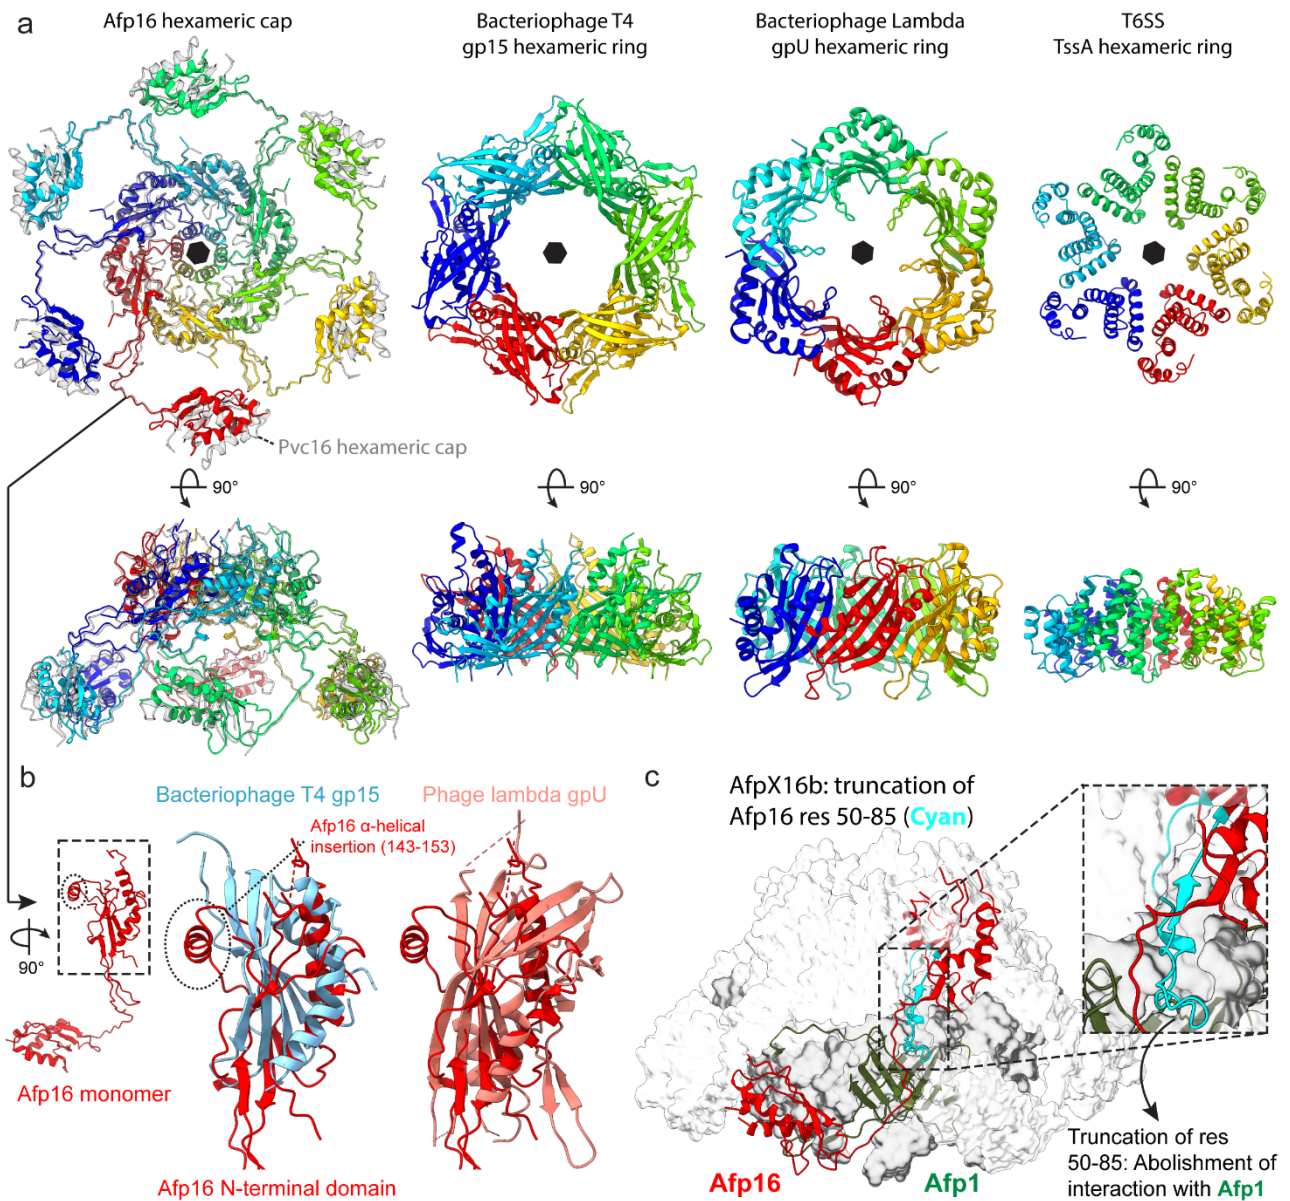

**Supplementary Figure 7: Structural comparison between the AFP apical cap protein Afp16, the PVC apical cap protein Pvc16, and the tail terminator proteins gp15 from phage T4, gpU from phage Lambda and TssA from T6SS.** (a) Top- (upper panels) and side-views (lower panels) of the hexameric cap formed by Afp16 aligned with the hexameric cap formed by Pvc16 (PDB ID: 6J0F), and hexameric rings formed by gp15 (PDB ID: 4HUH), gpU (PDB ID: 3FZB) and TssA (PDB ID: 4YO5). 6-fold rotation axes are indicated using black hexagons. (b) Structural alignment between the Afp16 N-terminal domain (red) and extracted monomers of phage T4 gp15 (light blue) and phage Lambda gpU (salmon). The  $\alpha$ -helical insertion of Afp16 spanning residues 143-153 is annotated using a dotted black oval. (c) Position of Afp1 and Afp16 in the AFP extended state apical cap. One copy of Afp1 and Afp16 are shown as cartoons and coloured green and red respectively, while

remaining Afp1 and Afp16 copies are shown as a transparent white surface. Afp16 residues 50-85 (coloured light cyan) are absent in AfpX16b, the cap protein in the AFP variant AFP-X in *S. proeamaculans*, thus leading to an abolished Afp1 interaction (see inset). This diminishes the capping capability of AfpX16b, resulting in greater variability in the lengths of AFP-X.

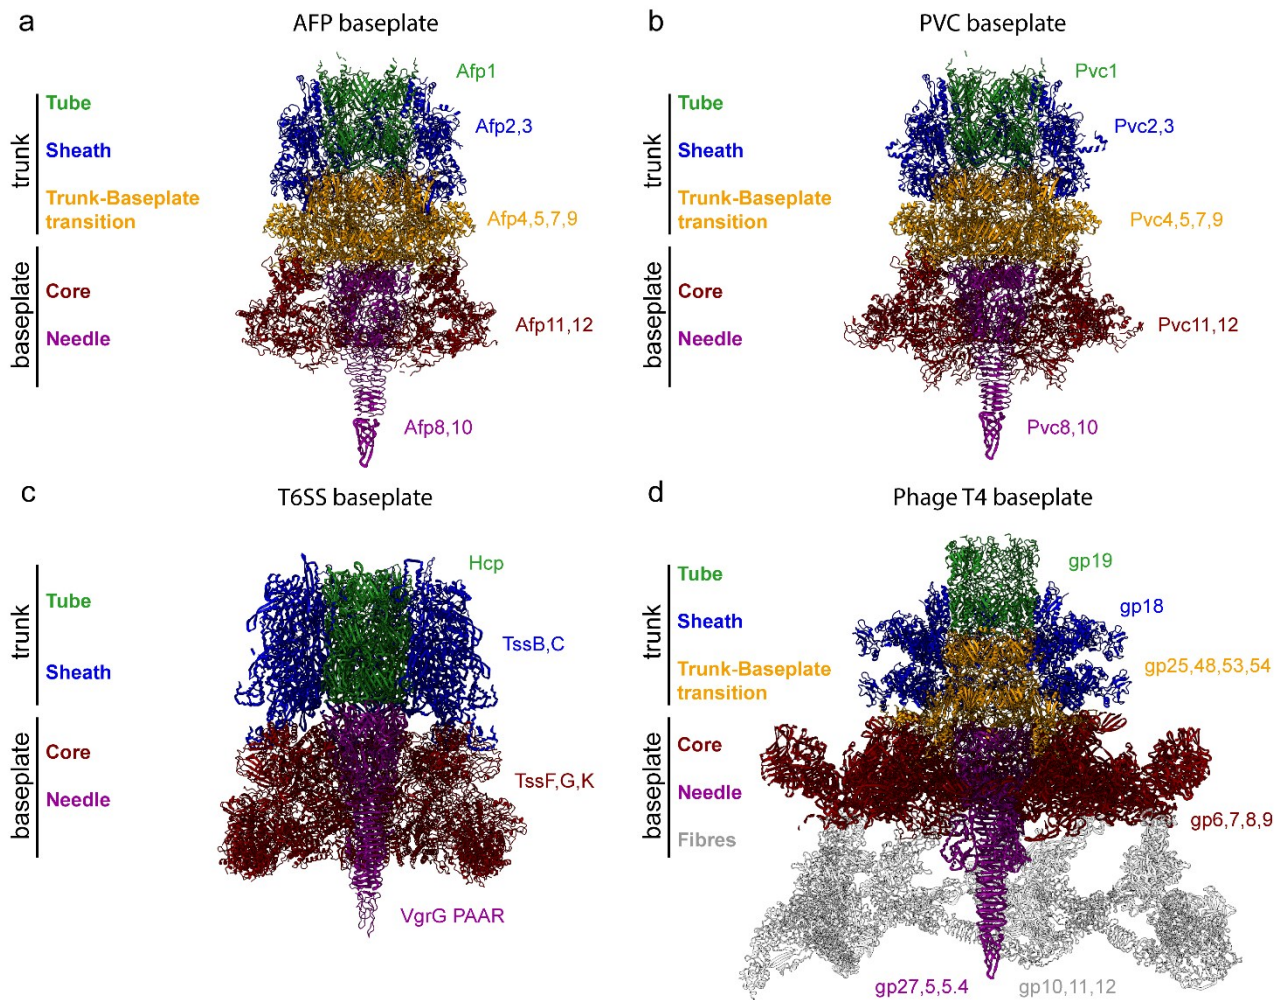

**Supplementary Figure 8: Comparison between the overall architecture of AFP, PVC, T6SS and phage T4 baseplate structures.** Cut-out front views of AFP (a), PVC (b), T6SS (c) and phage T4 (d) baseplate structures. For each structure, the first layers of the trunk are displayed. The individual proteins are coloured based on their position in the trunk (Tube: green, Sheath: blue, Trunk-Baseplate transition: orange) or baseplate (Core: red, Needle: purple and Fibres: transparent grey). Baseplate structures were generated as follows: For AFP and PVC, deposited structures of the respective baseplate (AFP: 6RAO, PVC: 6J0N) and needle (AFP: 6RBK, PVC: 6J0M) were combined with gp5.4 from phage T4, fitted in the AFP and PVC baseplate maps (AFP: EMD-4800, PVC: EMD-9764). For T4, the structure of the baseplate (PDB ID: 5IV5) and the structure of the sheath/tube (PDB ID: 3J2M), were fitted together in the cryo-EM reconstruction of the extended T4 tail (EMD-1126) to generate the full assembly. For T6SS, each subcomplex structure (Tube and sheath: PDB ID 5OJQ, Needle: PDB ID 4MTK and 4JIV, Core: PDB ID 6N38) was fitted into the cryo-EM reconstruction of the *Vibrio Cholerae* T6SS baseplate/needle (EMD-3879).

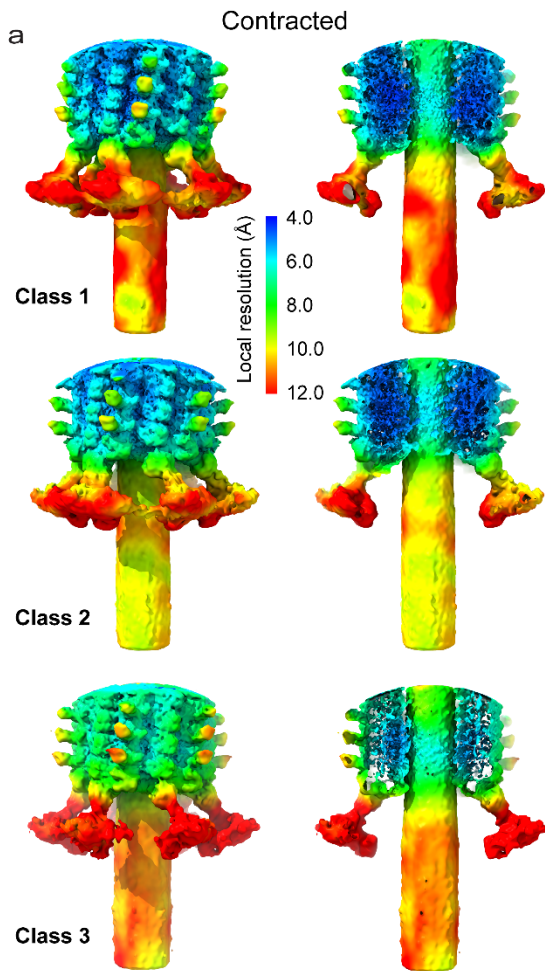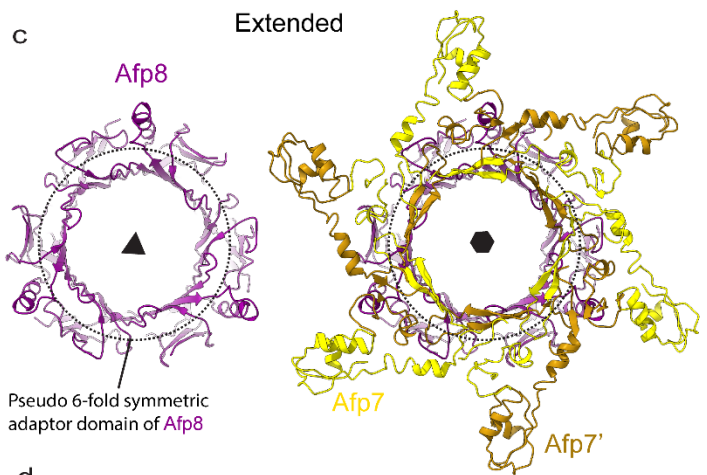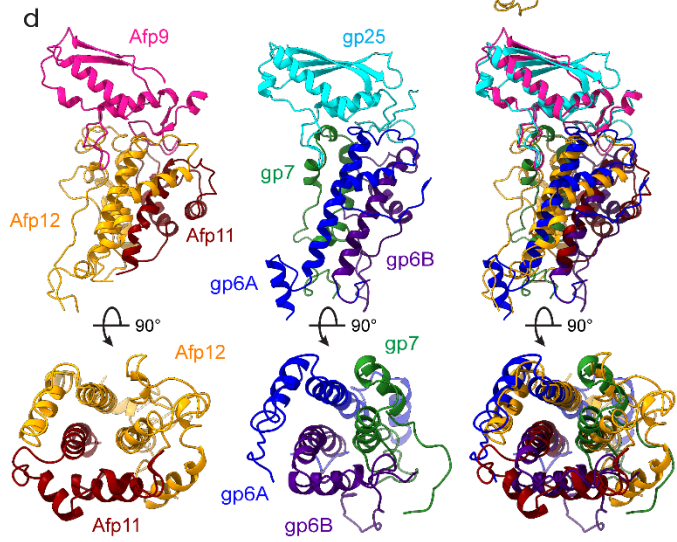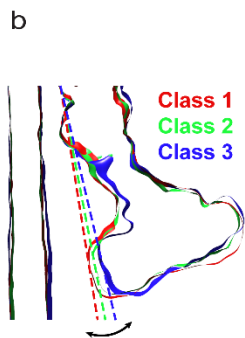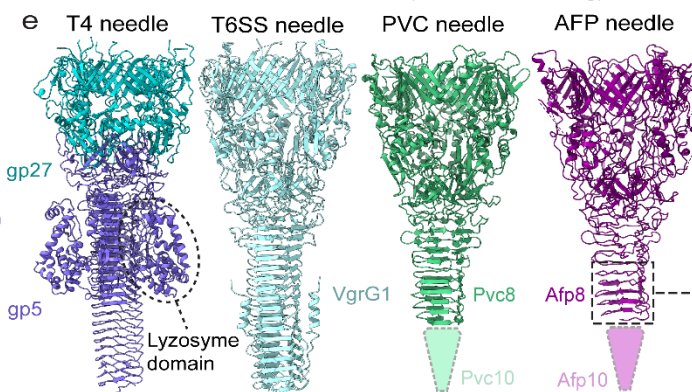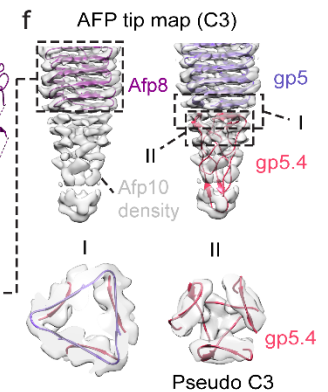

**g**

|       |     |                                                                           |    |     |
|-------|-----|---------------------------------------------------------------------------|----|-----|
| Afp10 | 1   | MSNLVVIDGDALTFNPQFGAITITPPQPRISGSGEASIGGKKICIVGDEKQVSFTVDYIKPPFVAS----    | PG | 69  |
| Pvc10 | 1   | MSEAIVVDGDLQFDNFGNRQVTVPSPGKISGTGHAQVSGKKVCILGDEKQVRVSATYITTT-HTT----     | PG | 68  |
| gp5.4 | 1   | MSG-----LSYDKCVTAGHEAWPPTVVNATQSKVFTGGIAVLVAGDPITE---HTEIKKPYETHGGVTQPR   |    | 63  |
|       | **  | * :: . . . . . : * . . . . . * : . . . . . * : . . . . . *                |    | *   |
| Afp10 | 70  | KGTLTIKALASEQRAEFATAPAPMIVVGSQFTTQFQPTTPAQDPQGKPD-T-LSAVTGVGTFINQSQSFVTAG |    | 140 |
| Pvc10 | 69  | TGTITISALDAGQALQCTSGAALI IKGQFTAMFTPELPAMNNTVTPPQPDVTPSSGKGRFITQQNFATVN   |    | 141 |
| gp5.4 | 64  | TSKVYVT---GKKA VQMA DP---ISCGD-----TVAQASSKVFIK-----                      |    | 97  |
|       | ... | ... : . . . . . : * : . . . . . * : . . . . . *                           |    | **  |

Residues conserved between Afp10 and Pvc10

Residues conserved between Afp10, Pvc10 and gp5.4

**Supplementary Figure 9: Structural description of the AFP baseplate and needle.** (a) Cryo-EM maps of three classes of the contracted AFP baseplate after 3D classification, coloured according to local resolution. Overall resolution estimates are 5.4 Å, 5.9 Å and 7.3 Å for Class 1, 2 and 3 respectively (see also Extended Figure 3). (b) Cut-out views of maps for Class 1, 2 and 3 of the contracted AFP baseplate illustrate the variability of the position of the wedge formed by Afp9, Afp11 and Afp12 (c) Depiction of the switch between pseudo 6-fold (3-fold) symmetry found in the adaptor domain of Afp8 (purple) in the extended AFP needle, and the 6-fold symmetry of the preceding Afp7 ring, with alternating Afp7 monomers coloured yellow/orange. 3-fold and 6-fold rotation axes are annotated with black triangles and hexagons respectively. (d) Structural comparison (left and middle) and alignment (right) between the complex formed by Afp9 (violet), Afp11 (dark red) and Afp12 (orange), extracted from the extended AFP baseplate, and the complex formed by phage T4 proteins gp6A (dark blue), gp6B (purple), gp7 (green) and gp25 (light blue) extracted from the phage T4 pre-attachment baseplate-tail tube complex (PDB ID: 5IV5). (e) Structural comparison between the needle from phage T4 (formed by gp5, coloured dark blue, and gp27, coloured cyan), T6SS (formed by VgrG1, coloured light blue), PVC (formed by Pvc8 and Pvc10) and AFP (formed by Afp8 and Afp10, coloured purple). The lysozyme domain in gp5 is annotated by a black dotted oval. T4, T6SS and PVC needle structures are extracted from PDB ID 1WTH, 6H3L and 6J0M respectively. (f) Zoom showing the cryo-EM map for the tip end of AFP with fitted Afp8 (left) or gp5 and gp5.4 (right) from phage T4. Inset I: gp5 is fitted in the upper part of the AFP tip map, which displays C3 symmetry. Inset II: The lower part of the AFP tip map displays pseudo-C3 symmetry and contains fitted gp5.4 (PDB ID: 4KU0). (g) Sequence alignment between Afp10, Pvc10 and gp5.4. Residues conserved between Afp10, Pvc10 and gp5.4 are labelled red, while residues conserved between Afp10 and Pvc10 are labelled black.



## Supplementary Tables

**Supplementary Table 1.** AFP proteins and their homologues

| Afp Protein | MW (no. of amino acids) | Number of copies in extended AFP <sup>1</sup> | Location, function                         | Phage T4 homologue | T6SS homologue | R-type pyocin homologue | PVC homologue |
|-------------|-------------------------|-----------------------------------------------|--------------------------------------------|--------------------|----------------|-------------------------|---------------|
| Afp1        | 16.4 kDa (149)          | 126                                           | Inner tube                                 | gp19               | Hcp            | PA0623                  | Pvc1          |
| Afp2        | 38.8 kDa (354)          | 66                                            | Sheath                                     | gp18               | TssB/C, VipA/B | PA0622                  | Pvc2          |
| Afp3        | 48.7 kDa (451)          | 60                                            | Sheath                                     | gp18               | TssB/C, VipA/B | PA0622                  | Pvc3          |
| Afp4        | 45.5 kDa (417)          | 6                                             | Sheath                                     | gp18               | TssB/C, VipA/B | PA0622                  | Pvc4          |
| Afp5        | 17.0 kDa (149)          | 6                                             | Second layer of inner tube, tube initiator | gp54               | Hcp            | PA0623                  | Pvc5          |
| Afp6        | 6.7 kDa (55)            | Unknown <sup>2</sup>                          | Unknown                                    | -                  | -              | -                       | Pvc6          |
| Afp7        | 25.2 kDa (229)          | 6                                             | First layer of inner tube, tube initiator  | gp48/gp53 LysM     | Hcp            | PA0623/PA0627 LysM      | Pvc7          |
| Afp8        | 58.0 kDa (529)          | 3                                             | Baseplate, needle                          | gp5/gp27           | VgrG           | PA0616/PA0628           | Pvc8          |
| Afp9        | 15.7 kDa (140)          | 6                                             | Baseplate, sheath initiator                | gp25               | TssE           | PA0617                  | Pvc9          |
| Afp10       | 14.5 kDa (140)          | 1                                             | Baseplate, needle tip                      | gp5.4              | VgrG PAAR      | PA0616                  | Pvc10         |
| Afp11       | 67.3 kDa (607)          | 6                                             | Baseplate                                  | gp6                | TssF           | PA0618                  | Pvc11         |
| Afp12       | 106.8 kDa (963)         | 6                                             | Baseplate                                  | gp6/gp7            | TssF/G         | PA0619                  | Pvc12         |
| Afp13       | 60.7 kDa (636)          | 6                                             | Tail fibre protein                         | gp12               | -              | PA0620                  | Pvc13         |
| Afp14       | 62.5 kDa (554)          | Not present <sup>3</sup>                      | Tape measure protein                       | gp29               | -              | PA0625                  | Pvc14         |
| Afp15       | 78.9 kDa (696)          | Not present <sup>3</sup>                      | Chaperone/ATPase (predicted)               | -                  | ClpV           | -                       | Pvc15         |
| Afp16       | 32.2 kDa (295)          | 6                                             | Cap                                        | gp15               | TssA           | PA0626                  | Pvc16         |
| Afp17       | 40.5 kDa (358)          | Not present <sup>3</sup>                      | Remnant toxin                              | -                  | -              | -                       | -             |
| Afp18       | 263.4 kDa (2366)        | 1 <sup>1,2</sup>                              | Toxin                                      | -                  | -              | -                       | -             |

<sup>1</sup>Number of proteins fitted in the cryo-EM map of the major population of extended AFP (terminated by Afp2-Afp16), except for Afp18, which was estimated to be present as a single copy by mass spectrometry

<sup>2</sup>Detected by mass spectrometry but not localised in the cryo-EM map

<sup>3</sup>Not detected by mass spectrometry

**Supplementary Table 2.** Cryo-EM data collection, refinement and validation statistics

|                                                     | Extended trunk<br>(EMDB-4802)<br>(PDB 6RBN) | Extended cap<br>ending Afp2-<br>Afp16<br>(EMDB-4784)<br>(PDB 6RAP) | Extended cap<br>ending Afp3-<br>Afp16<br>(EMDB-4801) | Extended<br>baseplate C6<br>(EMDB-4782)<br>(PDB 6RAO) | Extended<br>baseplate C3<br>(EMDB-4800)<br>(PDB 6RBK) | Extended<br>needle from<br>subtracted<br>images<br>(EMDB-4781) | Contracted<br>sheath<br>C6/helical<br>(EMDB-4803)<br>(PDB 6RC8) | Contracted<br>sheath C6<br>(EMDB-4859) | Contracted<br>baseplate<br>(EMDB-<br>6RGL) |
|-----------------------------------------------------|---------------------------------------------|--------------------------------------------------------------------|------------------------------------------------------|-------------------------------------------------------|-------------------------------------------------------|----------------------------------------------------------------|-----------------------------------------------------------------|----------------------------------------|--------------------------------------------|
| <b>Data collection and processing</b>               |                                             |                                                                    |                                                      |                                                       |                                                       |                                                                |                                                                 |                                        |                                            |
| Magnification                                       | 37,000x                                     | 37,000x                                                            | 37,000x                                              | 37,000x                                               | 37,000x                                               | 37,000x                                                        | 47,000x                                                         | 47,000x                                | 47,000x                                    |
| Voltage (kV)                                        | 300                                         | 300                                                                | 300                                                  | 300                                                   | 300                                                   | 300                                                            | 300                                                             | 300                                    | 300                                        |
| Electron exposure (e <sup>-</sup> /Å <sup>2</sup> ) | 20                                          | 20                                                                 | 20                                                   | 20                                                    | 20                                                    | 20                                                             | 27                                                              | 27                                     | 27                                         |
| Defocus range (µm)                                  | 1.0-3.5                                     | 1.0-3.5                                                            | 1.0-3.5                                              | 1.0-3.5                                               | 1.0-3.5                                               | 1.0-3.5                                                        | 1.0-3.5                                                         | 1.0-3.5                                | 1.0-3.5                                    |
| Pixel size (Å)                                      | 1.35                                        | 1.35                                                               | 1.35                                                 | 1.35                                                  | 1.35                                                  | 1.35                                                           | 1.40                                                            | 1.40                                   | 1.40                                       |
| Symmetry imposed                                    | C6, helical                                 | C6                                                                 | C6                                                   | C6                                                    | C3                                                    | C3                                                             | C6, helical                                                     | C6                                     | C6                                         |
| Initial particle images (no.)                       | 30,858                                      | 30,858                                                             | 30,858                                               | 46,991                                                | 46,991                                                | 46,991                                                         | 15,189                                                          | 15,189                                 | 30,378                                     |
| Final particle images (no.)                         | 30,858                                      | 23,797                                                             | 7061                                                 | 46,991                                                | 46,991                                                | 46,991                                                         | 15,189                                                          | 15,189                                 | 14,453                                     |
| Map resolution (Å)                                  | 2.78 Å                                      | 3.2 Å                                                              | 3.4 Å                                                | 3.1 Å                                                 | 3.3 Å                                                 | 3.7 Å                                                          | 3.8 Å                                                           | 4.2 Å                                  | 4.6 Å                                      |
| FSC threshold                                       | 0.143                                       | 0.143                                                              | 0.143                                                | 0.143                                                 | 0.143                                                 | 0.143                                                          | 0.143                                                           | 0.143                                  | 0.143                                      |
| Map resolution range (Å)                            | 2.7-3.3 Å                                   | 3.0-4.2 Å                                                          | 3.0-4.2 Å                                            | 2.9-4.2 Å                                             | 3.1-4.2 Å                                             | 3.4-5.0 Å                                                      | 3.8-5.0 Å                                                       | 4.0-6.0Å                               | 4–12 Å                                     |
| <b>Refinement</b>                                   |                                             |                                                                    |                                                      |                                                       |                                                       |                                                                |                                                                 |                                        |                                            |
| Initial model used (PDB code)                       | <i>de novo</i>                              | <i>de novo</i>                                                     | -                                                    | <i>de novo</i>                                        | <i>de novo</i>                                        | -                                                              | <i>de novo</i>                                                  | -                                      | -                                          |
| Model resolution (Å)                                | 3.1                                         | 3.4                                                                | -                                                    | 3.3                                                   | 3.4                                                   | -                                                              | 4.4                                                             | -                                      | -                                          |
| FSC threshold                                       | 0.5                                         | 0.5                                                                | -                                                    | 0.5                                                   | 0.5                                                   | -                                                              | 0.5                                                             | -                                      | -                                          |
| Model resolution range (Å)                          | ∞ - 3.1                                     | ∞ - 3.4                                                            | -                                                    | ∞ - 3.3                                               | ∞ - 3.4                                               | -                                                              | ∞ - 4.4                                                         | -                                      | -                                          |
| Map sharpening <i>B</i> factor (Å <sup>2</sup> )    | -92                                         | -100                                                               | -95                                                  | -105                                                  | -102                                                  | -166                                                           | -260                                                            | -240                                   | -270                                       |
| Model composition                                   |                                             |                                                                    |                                                      |                                                       |                                                       |                                                                |                                                                 |                                        |                                            |
| Non-hydrogen atoms                                  | 7745                                        | 9879                                                               | -                                                    | 22,409                                                | 7378                                                  | -                                                              | 5423                                                            | -                                      | -                                          |
| Protein residues                                    | 1004                                        | 1398                                                               | -                                                    | 3608                                                  | 987                                                   | -                                                              | 805                                                             | -                                      | -                                          |
| Ligands                                             | 0                                           | 0                                                                  | -                                                    | 0                                                     | 0                                                     | -                                                              | 0                                                               | -                                      | -                                          |
| <i>B</i> factors (Å <sup>2</sup> )                  |                                             |                                                                    |                                                      |                                                       |                                                       |                                                                |                                                                 |                                        |                                            |
| Protein                                             | 77                                          | 55                                                                 | -                                                    | 51                                                    | 46                                                    | -                                                              | 91                                                              | -                                      | -                                          |
| Ligand                                              | -                                           | -                                                                  | -                                                    | -                                                     | -                                                     | -                                                              | -                                                               | -                                      | -                                          |
| R.m.s. deviations                                   |                                             |                                                                    |                                                      |                                                       |                                                       |                                                                |                                                                 |                                        |                                            |
| Bond lengths (Å)                                    | 0.0068                                      | 0.0084                                                             | -                                                    | 0.0086                                                | 0.0090                                                | -                                                              | 0.0036                                                          | -                                      | -                                          |
| Bond angles (°)                                     | 1.27                                        | 1.40                                                               | -                                                    | 1.44                                                  | 1.57                                                  | -                                                              | 1.07                                                            | -                                      | -                                          |
| Validation                                          |                                             |                                                                    |                                                      |                                                       |                                                       |                                                                |                                                                 |                                        |                                            |
| MolProbity score                                    | 1.56                                        | 1.82                                                               | -                                                    | 2.31                                                  | 2.17                                                  | -                                                              | 1.91                                                            | -                                      | -                                          |
| Clashscore                                          | 3                                           | 5                                                                  | -                                                    | 10                                                    | 5                                                     | -                                                              | 5                                                               | -                                      | -                                          |
| Poor rotamers (%)                                   | 0.8                                         | 1.5                                                                | -                                                    | 2.0                                                   | 1.7                                                   | -                                                              | 1.1                                                             | -                                      | -                                          |
| Ramachandran plot                                   |                                             |                                                                    |                                                      |                                                       |                                                       |                                                                |                                                                 |                                        |                                            |
| Favored (%)                                         | 92.9                                        | 90.1                                                               | -                                                    | 87.6                                                  | 84.5                                                  | -                                                              | 87.6                                                            | -                                      | -                                          |
| Allowed (%)                                         | 6.8                                         | 9.7                                                                | -                                                    | 11.8                                                  | 15.0                                                  | -                                                              | 12.4                                                            | -                                      | -                                          |
| Disallowed (%)                                      | 0.3                                         | 0.2                                                                | -                                                    | 0.6                                                   | 0.5                                                   | -                                                              | 0.0                                                             | -                                      | -                                          |

**Supplementary Table 3.** Model refinement and validation statistics for individual Afp proteins

| Protein                                 | Afp1 (Afp2-bound) | Afp1 (Afp3-bound) | Afp1 (apical)  | Afp1 (proximal) | Afp2            | Afp2 (apical)   | Afp2 (proximal) | Afp3            | Afp4            | Afp5           | Afp7 (A) <sup>1</sup> | Afp7 (B) <sup>1</sup> | Afp8            | Afp9            | Afp11           | Afp12           | Afp16           | Afp2 (contracted) | Afp2 (contracted, proximal) | Afp3 (contracted) | Afp4 (contracted) |
|-----------------------------------------|-------------------|-------------------|----------------|-----------------|-----------------|-----------------|-----------------|-----------------|-----------------|----------------|-----------------------|-----------------------|-----------------|-----------------|-----------------|-----------------|-----------------|-------------------|-----------------------------|-------------------|-------------------|
| PDB ID                                  | 6RBN              | 6RBN              | 6RAP           | 6RAO            | 6RBN            | 6RAP            | 6RAO            | 6RBN            | 6RAO            | 6RAO           | 6RBK                  | 6RBK                  | 6RBK            | 6RAO            | 6RAO            | 6RAO            | 6RAP            | 6RC8              | 6RGL                        | 6RC8              | 6RGL              |
| Map used for building <sup>2</sup>      | ET                | ET                | EC             | EB6             | ET              | EC              | EB6             | ET              | EB6             | EB6            | EB3                   | EB3                   | EB3             | EB6             | EB6/EB3         | EB6/EB3         | EC              | CS                | CB                          | CS                | CB                |
| R.m.s deviations                        |                   |                   |                |                 |                 |                 |                 |                 |                 |                |                       |                       |                 |                 |                 |                 |                 |                   |                             |                   |                   |
| Bond lengths (Å)                        | 0.0071            | 0.0076            | 0.0106         | 0.0098          | 0.0068          | 0.0096          | 0.0084          | 0.0063          | 0.0096          | 0.0104         | 0.0088                | 0.0089                | 0.0086          | 0.0080          | 0.0087          | 0.0091          | 0.0083          | 0.0036            | 0.0118                      | 0.0036            | 0.0107            |
| Angles (°)                              | 1.22              | 1.31              | 1.43           | 1.40            | 1.27            | 1.40            | 1.38            | 1.27            | 1.41            | 1.37           | 1.50                  | 1.57                  | 1.57            | 1.54            | 1.46            | 1.53            | 1.56            | 1.08              | 1.59                        | 1.05              | 1.58              |
| Validation                              |                   |                   |                |                 |                 |                 |                 |                 |                 |                |                       |                       |                 |                 |                 |                 |                 |                   |                             |                   |                   |
| MolProbity score                        | 1.69              | 1.44              | 2.24           | 1.68            | 1.61            | 1.58            | 1.88            | 1.56            | 2.47            | 1.77           | 1.83                  | 2.19                  | 1.97            | 2.21            | 1.98            | 2.19            | 2.24            | 2.03              | 2.60                        | 1.89              | 2.47              |
| Clashscore                              | 5.28              | 2.20              | 7.86           | 3.96            | 3.37            | 2.26            | 5.80            | 3.29            | 11.99           | 4.58           | 3.78                  | 4.91                  | 4.49            | 6.02            | 5.85            | 6.88            | 11.14           | 4.90              | 14.53                       | 4.98              | 17.82             |
| Rotamer outliers (%)                    | 0.00              | 0.00              | 3.12           | 0.00            | 0.35            | 0.71            | 1.06            | 0.68            | 2.50            | 0.00           | 0.00                  | 2.11                  | 1.19            | 2.78            | 0.55            | 1.33            | 0.85            | 1.77              | 2.13                        | 0.00              | 2.13              |
| C-beta outliers                         | 0                 | 0                 | 0              | 0               | 0               | 0               | 1               | 0               | 3               | 0              | 0                     | 0                     | 0               | 0               | 0               | 0               | 1               | 0                 | 0                           | 0                 | 0                 |
| Ramachandran                            |                   |                   |                |                 |                 |                 |                 |                 |                 |                |                       |                       |                 |                 |                 |                 |                 |                   |                             |                   |                   |
| Favoured (%)                            | 93.84             | 93.15             | 93.20          | 91.78           | 92.24           | 88.76           | 89.97           | 93.18           | 88.95           | 90.48          | 85.07                 | 83.33                 | 93.27           | 90.08           | 84.86           | 81.16           | 84.27           | 88.44             | 83.53                       | 86.82             | 85.79             |
| Allowed (%)                             | 5.48              | 5.48              | 6.80           | 6.85            | 7.76            | 11.24           | 9.74            | 6.82            | 10.79           | 9.52           | 14.93                 | 16.22                 | 16.13           | 6.61            | 14.92           | 18.47           | 15.73           | 11.56             | 46.47                       | 13.18             | 13.68             |
| Disallowed (%)                          | 0.68              | 1.37              | 0.00           | 1.37            | 0.00            | 0.00            | 0.29            | 0.00            | 0.26            | 0.00           | 0.00                  | 0.45                  | 0.60            | 3.31            | 0.22            | 0.37            | 0.00            | 0.00              | 0.00                        | 0.00              | 0.00              |
| Amino acids built/total amino acids (%) | 148/149 (99.3%)   | 148/149 (99.3%)   | 149/149 (100%) | 148/149 (99.3%) | 350/354 (98.9%) | 349/354 (98.6%) | 351/354 (99.2%) | 359/451 (79.6%) | 386/417 (92.6%) | 149/149 (100%) | 224/229 (97.8%)       | 223/229 (97.3%)       | 504/529 (95.3%) | 125/140 (89.3%) | 465/607 (76.6%) | 546/963 (56.7%) | 276/295 (93.6%) | 348/354 (98.3%)   | 348/354 (98.3%)             | 355/451 (78.7%)   | 386/417 (92.6%)   |

<sup>1</sup>Afp7 (A) and (B) correspond to adjacent (but non symmetry-related) copies of Afp7 in the 3-fold symmetrised baseplate

<sup>2</sup>ET = extended trunk, EC = extended cap (ending Afp2-Afp16), EB6 = extended baseplate C6, EB3 = extended baseplate C3, CS = contracted sheath (helical), CB = contracted baseplate

**Supplementary Table 4.** Interaction energy and buried surface area between extended AFP needle, tube and cap subunits

| Interaction | $\Delta G$ , kcal/mol | Buried Surface Area, $\text{\AA}^2$ | Description                                                      |
|-------------|-----------------------|-------------------------------------|------------------------------------------------------------------|
| Afp8-Afp7   | -19.6                 | 1568.8                              | Value for 1x Afp8 + 4x Afp7                                      |
| Afp7-Afp5   | -12.0                 | 859.9                               | Value for 1x Afp5 + 2x AFP7                                      |
| Afp5-Afp1   | -17.2                 | 1087.9                              | Value for 1x Afp5 + 4x Afp1                                      |
| Afp1-Afp1   | -22.7                 | 1325.8                              | Value for 1x Afp1 in one layer with 4x Afp1 from adjacent layers |
| Afp1-Afp16  | -20.7                 | 1594.0                              | Value for 1x Afp16 + 3x Afp1                                     |

**Supplementary Table 5.** Comparison of AFP, R-pyocin and T6SS state tube-tube, sheath-sheath and tube-sheath interaction energies

| Interaction                                             | AFP $\Delta G$ , kcal/mol | R-Pyocin $\Delta G$ , kcal/mol | T6SS $\Delta G$ , kcal/mol |
|---------------------------------------------------------|---------------------------|--------------------------------|----------------------------|
| Tube-sheath                                             | -4.2                      | -1.4                           | -3.3                       |
| Tube-tube                                               | -51.9                     | -49.0                          | -49.1                      |
| Sheath-sheath (extended)                                | -105.2                    | -57.5                          | -129.4                     |
| Sheath-sheath (contracted)                              | -111.0                    | -68.0                          | -161.2                     |
| <b>Contracted and extended sheath-sheath difference</b> | <b>-5.8</b>               | <b>-10.5</b>                   | <b>-31.8</b>               |

**Supplementary Table 6.** Interaction energies and buried surface areas between Afp2 and Afp3 subunits for extended and contracted AFP sheath

| Interaction                       | Extended state        |                       |                                     | Contracted state      |                       |                                     |
|-----------------------------------|-----------------------|-----------------------|-------------------------------------|-----------------------|-----------------------|-------------------------------------|
|                                   | $\Delta G$ , kcal/mol | Contribution to total | Buried surface area, $\text{\AA}^2$ | $\Delta G$ , kcal/mol | Contribution to total | Buried surface area, $\text{\AA}^2$ |
| Afp2 C-ter-Afp3 C-ter (layer n-1) | -27.4                 | 26%                   | 1417.4                              | -26.6                 | 24%                   | 1529.5                              |
| Afp2 C-ter-Afp3 C-ter (layer n+1) | -30.0                 | 29%                   | 1613.1                              | -25.6                 | 23%                   | 1559.6                              |
| Afp2 C-ter-Afp3 N-ter (layer n+1) | -10.9                 | 10%                   | 691.5                               | -10.5                 | 9%                    | 531.4                               |
| Afp2 N-ter-Afp2 C-ter (layer n)   | -12.4                 | 12%                   | 617.0                               | -11.3                 | 10%                   | 554.7                               |
| Afp2 N-ter-Afp3 C-ter (layer n-1) | -10.6                 | 10%                   | 649.6                               | -10.1                 | 9%                    | 640.1                               |
| Afp3 N-ter-Afp3 C-ter (layer n)   | -13.9                 | 13%                   | 657.4                               | -11.1                 | 10%                   | 569.2                               |
| Afp2-Afp2 (layers n+2/n-2)        | -                     | -                     | -                                   | -7.4                  | 7%                    | 567.7                               |
| Afp3-Afp3 (layers n+2/n-2)        | -                     | -                     | -                                   | -8.4                  | 8%                    | 587.7                               |
| <b>TOTAL</b>                      | <b>-105.2</b>         | <b>100%</b>           | <b>5646.0</b>                       | <b>-111.0</b>         | <b>100%</b>           | <b>6539.9</b>                       |
